1 **Laboratory surrogate markers of residual HIV replication among distinct groups of**  
2 **individuals under antiretroviral therapy**

3

4 Giron, L.B.<sup>1\*</sup>; Tenore, S.B.<sup>1</sup>; Janini, L.M.<sup>1</sup>; Sucupira, M.C.<sup>1</sup>; Diaz, R.S.<sup>1#</sup>

5 <sup>1</sup>Federal University of Sao Paulo, Infectious Diseases Department, São Paulo, SP, Brazil.

6

7 **Running Title:** Residual HIV replication and ART

8

9 \* Present address: The Wistar Institute, Philadelphia, PA, USA

10 # Address correspondence to: Ricardo Sobhie Diaz [rsdiaz@catg.com.br](mailto:rsdiaz@catg.com.br)

11

12

13

14

## 15 **Abstract**

16 **Background:** Residual HIV-1 replication among individuals under antiretroviral therapy  
17 (ART) relates to HIV micro-inflammation.

18 **Objectives:** To determine levels of residual HIV replication markers among distinct  
19 subgroups of antiretroviral-treated individuals.

20 **Methods:** 116 patients were distributed into 5 treatment groups: first-line suppressive ART  
21 with non-nucleoside reverse-transcriptase inhibitor (NNRTI) (n=26), first-line suppressive  
22 ART with boosted protease inhibitors (PI-r) (n=25), salvage therapy using PI-r (n=27),  
23 salvage therapy with PI-r and raltegravir (n=22) and virologic failure (n=16). Episomal and  
24 total DNA quantitation was evaluated. ELISA was used for HIV antibody and LPS  
25 quantitation.

26 **Results:** Episomal DNA was positive in 26% to 38% of individuals under suppressive ART,  
27 being higher among individuals experiencing virologic failure (p=0.04). HIV proviral load  
28 was higher among patients with detectable episomal DNA (p=0.01). Individuals receiving  
29 initial PI-r treatment presented lower HIV antibodies (p=0.027) and LPS (p=0.029) than  
30 individuals receiving NNRTI. There was a negative correlation between episomal DNA  
31 quantitation and suppressive ART duration (p=0.04), CD4+ T-cell count (p=0.08), and CD8+  
32 T-cell count (p=0.07).

33 **Conclusions:** Residual HIV replication has been inferred among individuals under  
34 suppressive ART according to episomal DNA detection. Residual replication may decrease  
35 with longer periods of suppressive ART and higher levels of CD4+ and CD8+ T cells. The  
36 relationship between episomal DNA and total DNA suggests a replenishment of the proviral  
37 reservoir with impacts on HIV persistence. Lower antibody and LPS levels among patients  
38 with initial PI-r ART suggest these regimens may more effectively suppress HIV with higher  
39 capacity to decrease the HIV antigenic component.

## 40 **Introduction**

41           The deleterious effects of HIV are directly related to viral replication, which leads to  
42 inflammatory processes, such as the activation of CD4+ and CD8+ T lymphocytes (1).  
43 Maintaining viral replication at lower levels is critical for the reduction of cellular activation  
44 and co-morbidities related to HIV-1 infection. However, the antiretroviral therapy (ART)  
45 currently used does not completely suppress viral replication. Up to 80% of patients with  
46 undetectable viral loads according to commercial tests show an average of 3.1 copies/mL of  
47 residual viral load when ultrasensitive tests are used (2, 3). Although the stability of episomal  
48 DNA is not completely understood, extrachromosomal DNA is useful as a surrogate marker  
49 of HIV-1 replication when the HIV viral load is not detectable by currently available methods  
50 (4). Other markers that relate to HIV-1 replication among individuals under ART include  
51 proviral HIV DNA (5) and the quantitation of HIV antibody levels (6) or markers that relate  
52 to bacterial translocation (7). ART regimens differ in potency as well as in the distinct genetic  
53 barriers they create or effects they have in each step of the HIV replication cycle to alter viral  
54 dynamics. For this reason, the evaluation of circular HIV DNA could be used as a tool to  
55 indirectly compare the effectiveness of these distinct regimens on residual HIV replication.  
56 Therefore, this study aimed to analyze surrogate markers of the residual replication rates of  
57 HIV-1 among individuals receiving different antiretroviral regimens. We hypothesize that  
58 drugs from different classes and previous ART virologic failure will affect surrogate markers  
59 of HIV residual replication.

## 60 **Methods**

### 61 **Patients**

62           Patients were chosen between 2011 to 2013 in São Paulo Brazil according to their  
63 current antiretroviral treatment (see Supplementary Table 1). Individuals were under ART  
64 with undetectable plasma viral loads for at least one year, except for the virologic failure

65 group. This study was approved by the Ethics Committee in Research at the Federal  
66 University of São Paulo (approval #0201/11), and informed consent was obtained from all  
67 patients.

68 One hundred sixteen patients were allocated to five treatment subgroups as follows:  
69 (1) patients treated with two nucleoside-analogue reverse-transcriptase inhibitors (NRTI)  
70 associated with the non-nucleoside analog reverse-transcriptase inhibitors (NNRTI) Efavirenz  
71 or Nevirapine as the first ART regimen; (2) patients treated with two NRTIs and a protease  
72 inhibitor boosted with ritonavir (PI-r) as the first ART regimen; (3) patients on salvage  
73 therapy with two NRTIs and a PI-r; (4) patients under salvage therapy containing two NRTIs,  
74 PI-r and the integrase inhibitor raltegravir; and (5) patients under antiretroviral virologic  
75 failure with the confirmed presence of HIV ART resistant strains. Peripheral blood samples  
76 were collected, and clinical data on the patients were analyzed, including CD4+ and CD8+ T-  
77 cell counts, the duration of treatment with undetectable viral loads and the number of ART  
78 schemes previously used by the patient.

### 79 **HIV-1 Episomal DNA Detection and Quantitation**

80 To obtain HIV episomal DNA, 400  $\mu$ L of peripheral blood mononuclear cells  
81 (PBMC) isolated using density gradient centrifugation were extracted using a QIAprep Spin  
82 Miniprep commercial kit (Qiagen, Valencia, California, USA). After extraction, qPCR  
83 amplification was performed in a single round of 45 qPCR cycles to amplify  
84 extrachromosomal DNA as previously described (8, 9). The qPCR quantitation values were  
85 normalized based on cell numbers estimated by CCR5 quantitation and are expressed as the  
86 number of DNA copies per  $10^6$  PBMC.

### 87 **Total HIV DNA Quantitation**

88 Total viral DNA was extracted from 50  $\mu$ L of PBMC using a Blood QIAamp DNA  
89 Mini Kit Mini Kit (Qiagen, Valencia, California, USA) according to the manufacturer's

90 instructions. Total HIV DNA was qPCR amplified using a mix containing 1x TaqMan  
91 Universal PCR Master Mix (Applied Biosystems), 0.4  $\mu$ M primers/probe(10) (F522-43  
92 GCCTCAATAAAGCTTGCCTTGA, R626-43 GGGCGCCACTGCTAGAGA and Probe  
93 CCAGAGTCACACAACAGACGGGCACA) and 5  $\mu$ l of extracted DNA. CCR5 was also  
94 used to quantify genomes to express the measurements as copies per  $10^6$  PBMC.

### 95 **Quantitation of anti-HIV-1 Antibodies**

96 HIV-1 specific antibodies were measured using the capture enzyme immunoassay kit  
97 Aware BED Incident HIV-1 EIA Test (Calypte Biomedical Corporation, Portland, Oregon,  
98 USA) according to the manufacturer's instructions. The optical density values of the samples  
99 were normalized based on the controls (negative, calibrator, lower positive and higher  
100 positive) using the spreadsheet available at [http://www.calypte.com/aware\\_BED.html](http://www.calypte.com/aware_BED.html).  
101 Specimens with an ODn > 0.8 are considered positive.

### 102 **Levels of LPS in Plasma**

103 The quantitation of endotoxin was performed using a Limulus Amebocyte Lysate  
104 (LAL) QCL-1000 (Lonza, Walkersville, MD) kit according to the manufacturer's  
105 instructions. The absorbance was determined spectrophotometrically at 405–410 nm. Since  
106 this absorbance is in direct proportion to the amount of endotoxin present, the concentration  
107 of endotoxin was calculated from a standard curve. The background color of the sample was  
108 subtracted.

### 109 **Statistical analysis**

110 The Statistical Program for the Social Sciences, version 18.0 (SPSS 18.0) was used  
111 for data analysis. Descriptive analyses, ANOVA using z-score normalized data, and chi-  
112 squared tests, at a confidence level of 5%, were performed.

## 113 **Results**

### 114 **Episomal DNA**

115 The general patient data including age, gender, CD4+ and CD8+ T-lymphocyte  
116 counts, treatment time, number of regimens and number of medications used were compiled  
117 and are shown in Tables 1 and 2, grouped according to the type of ART received.

118 2-LTR circles were detected in 39 (34%) of the patients in the study. Table 3  
119 summarizes the measurements obtained according to treatment group. The treatment group  
120 had no effect on the quantitation of episomal HIV DNA ( $F(115,4) = 1.263$ ,  $p = 0.289$ ). The  
121 prevalence of detectable 2-LTR ( $n=39$ ) was not different between the groups ( $F(38,4)=1.014$ ,  
122  $p=0.414$ ).

123 There was no difference in the quantitation of 2-LTR circles among groups with first  
124 treatment ( $F(49,1) = 1.429$ ,  $p = 0.23$ , Figure 1A). Additionally, there was no difference ( $F$   
125  $(47,1) = 1.692$ ,  $p = 0.20$ ) when comparing the 2 distinct salvage therapy groups. We also  
126 observed no difference between the two groups receiving PI-r ( $F(50,1)=0.197$ ,  $p=0.65$ ).  
127 Furthermore, there was no significant difference between the first treatment groups together  
128 and the salvage groups together, ( $F(98,1) = 1.229$ ,  $p = 0.27$ ) nor when comparing the groups  
129 with virologic success to that of virologic failure ( $F(114,1) = 0.601$ ,  $p = 0.44$ ).

130 We then transformed episomal DNA quantitation into a categorical variable for  
131 detection and named samples LTR positive when detection was possible and LTR negative  
132 when there was no detection. Based on this categorization, we performed a chi-square test.  
133 The results showed no statistically significant association between the received treatment and  
134 the detection of circular DNA ( $\chi^2(3) = 5.412$ ,  $p = 0.248$ ). Comparing the number of positive  
135 episomal DNA samples between the subjects with virologic suppression and individuals  
136 experiencing virologic failure, there was an increase in the number of episomal DNA-positive

137 samples in the failure group ( $\chi^2 (3) = 4.259, p = 0.039$ , Figure 2A). In addition, the mean of  
138 total DNA was higher among individuals with positive episomal DNA (ANOVA,  $F (109,1) =$   
139  $2.794, p = 0.09$ ; Figure 2B).

#### 140 **Total HIV DNA**

141 Total HIV DNA was detected in 111 (96%) of the patients included in the study  
142 (Table 3). An ANOVA tests showed no differences between the treatment groups for  
143 quantitation of total HIV DNA ( $F (115,4) = 2.015, p = 0.098$ ; Table 3 and Figure 1B).  
144 Additionally, there was no difference in total HIV DNA quantitation between the groups with  
145 a first-line regimen (Groups 1 and 2,  $F(47,1) = 0.010, p = 0.922$ ), nor between the two groups  
146 on salvage therapy (Groups 3 and 4,  $F (44,1) = 1.230, p = 0.273$ ), nor between the groups on  
147 a first-line regimen and salvage therapy ( $F (93,1) = 0.007, p = 0.935$ ). Finally, there was a  
148 difference between the groups with virologic success and virologic failure ( $F (109,1) = 7.528,$   
149  $p = 0.007$ ) in which virological failure group shows higher total HIV DNA mean.

150 There was no statistical significance between total HIV DNA and the other tested  
151 variables.

#### 152 **Quantitation of anti-HIV-1 antibodies**

153 In this test, we considered samples with normalized optical densities (ODn) higher or  
154 equal to 0.8 as positive. Table 3 summarizes the measurements obtained according to  
155 treatment group. ANOVA showed no differences in the HIV antibody levels between the  
156 groups ( $F (115,4) = 1.675, p = 0.161$ , Figure 1C). However, the antibody levels were higher  
157 among patients given first treatment with NNRTI compared to first treatment with PI-r  
158 (ANOVA;  $F (49,1) = 5.189, p = 0.027$ ). There was no difference when comparing the two  
159 types of salvage therapy schemes ( $F(47,1)=0.189, p = 0.66$ ) nor between the first-line  
160 treatment and salvage therapy groups ( $F(98,1)=0.146, p = 0.70$ ). In addition, there was no

161 difference when comparing the groups with virologic successful and virologic failure  
162 ( $F(114,1)=1.289$ ,  $p = 0.25$ ).

163 Considering ODn as a categorical variable in which positive samples had an ODn  $\geq$   
164 0.8, there was a decreased number of positive samples in the first treatment group using PI-r  
165 ( $\chi^2(1) = 9.600$ ,  $p = 0.007$ ) compared to the first treatment group using NNRTI as well as an  
166 increase in positivity when compared to salvage therapy with PI ( $\chi^2(1) = 4.038$ ,  $p = 0.044$ )  
167 (Figure 3). There was no significant difference between the first-line regimen groups and the  
168 salvage therapy groups, ( $\chi^2(1)=0.360$ ,  $p=0.34$ ) nor any difference when comparing groups  
169 with or without virologic failure ( $\chi^2(1)=1.945$ ,  $p=0.13$ ).

170 Positive antibody quantitation was not associated with the positivity of episomal  
171 DNA ( $\chi^2(1) = 1.889$ ,  $p = 0.119$ ) or with the episomal DNA quantitation ( $F(114,1)=0.112$ ,  
172  $P=0.738$ ). Patients with positive antibody quantitation showed slightly higher HIV total DNA  
173 ( $F(109,1)=2.787$ ,  $p=0.09$ ).

#### 174 **LPS quantitation**

175 Due to the unavailability of samples, LPS quantitation was performed for only 55  
176 patients (Table 3). An ANOVA test showed a significant difference between the first-line  
177 regimen groups, with LPS higher among individuals treated with NNRTI compared to PI-r  
178 ( $F(55,4)=2.947$ ,  $p= 0.029$ , Figure 1D), as well as between the NNRTI and salvage therapy  
179 groups and the PI-r group ( $p=0.019$ , Bonferroni Test).

#### 180 **Correlations**

181 Spearman correlation tests were performed only with samples in which episomal  
182 DNA was detected. There was a negative correlation between the quantitation of episomal  
183 DNA and the CD8+ T-cell count ( $\rho = -0.426$ ,  $p = 0.007$ ) and the CD4+ T-cell count ( $\rho = -$



184 0.276,  $p = 0.08$ ), LPS quantitation in plasma ( $\rho = -0.500$ ,  $p = 0.041$ ) and treatment time with  
185 an undetectable viral load ( $\rho = -0.358$ ,  $p = 0.044$ ).

186 Spearman correlation between total HIV DNA showed positive correlation with  
187 episomal DNA quantitation ( $\rho = 0.256$ ,  $p = 0.007$ ), antibody levels ( $\rho = 0.181$ ,  $p = 0.05$ ) and  
188 also a negative correlation with CD8<sup>+</sup> T-cell count ( $\rho = -0.243$ ,  $p = 0.01$ ) and trend to  
189 correlate with CD4<sup>+</sup> T-cell count ( $\rho = -0.16$ ,  $p = 0.09$ ).

## 190 **Discussion**

191 As mentioned before, antiretroviral treatment is not fully suppressive in all  
192 individuals, as shown by the detection of viremia in individuals evaluated with ultrasensitive  
193 viral load assays (3) or with tests for cell-associated RNA (11). Interestingly, this residual  
194 viremia may come from so-called sanctuaries, such as the gastrointestinal tract (12). As such,  
195 they form an obstacle for achieving a sterilizing cure. Furthermore, specific HIV  
196 inflammation inferred by the levels of T-cell lymphocyte activation persists among  
197 antiretroviral treated individuals in spite of undetected viral loads (13). Efforts and strategies  
198 to mitigate HIV-related inflammation is currently a major task. One effective way to  
199 decrease this inflammation would be to maximize the antiretroviral suppressive effect, thus  
200 reducing residual replication.

201 Furthermore, continuous suppressive therapy is able to decrease the number of latent  
202 HIV infected cells over time (14), bringing the individual close to a sterilizing cure when the  
203 right strategies become available. On the other hand, residual viremia is conceivably able to  
204 replenish latent HIV reservoirs.

205 To learn more about residual HIV-1 replication among individuals under ART, we  
206 used different surrogate markers of HIV replication. The presence and quantitation of  
207 episomal HIV DNA has been considered one accurate marker to infer active HIV replication  
208 and its entrance into the cell environment (9, 15). Total or integrated HIV DNA also

209 indicates the size the HIV infected cell pool. It is well known that early treatment initiation  
210 affects the number of latently infected cells (16), and over time, cells will exit latency and  
211 die, decreasing the proviral DNA pool in ART treated individuals. The levels of HIV-1  
212 antibodies detected using less sensitive assays also relate to the levels of HIV-1 replication  
213 (6). As HIV-1 residual replication may come from the gastrointestinal tract (12), it is also  
214 conceivable that less effective antiretroviral treatment could be associated with higher levels  
215 of bacterial translocation (7) and therefore increasing laboratory translocation markers such  
216 as LPS or sCD14 levels.

217 We also wanted to investigate the relationship between different HIV ART schemes  
218 or strategies. The main questions were: is initial treatment more suppressive when two  
219 distinct steps of reverse transcription are inhibited, such as schemes using NRTIs with an  
220 NNRTI, or is the inhibition of pre- and post-integration more effective, such as schemes  
221 using NRTIs and boosted PI? A number of clinical trials comparing NNRTI with boosted PIs  
222 as the second antiretroviral class show one advantage of NNRT, which relies mainly on  
223 tolerance and adherence issues, since boosted PI schemes do not present antiretroviral  
224 resistance upon failure (17). The other question is whether salvage therapy is associated with  
225 more residual HIV replication than initial antiretroviral therapy. Usually, salvage therapy  
226 relies on a boosted PI-based regimen with or without the use of a new antiretroviral class.  
227 Therefore, a further question would be whether the association of a third antiretroviral class  
228 would more suppressive than salvage therapy schemes containing 2 NRTIs and a boosted PI  
229 only. We therefore performed a cross-sectional evaluation of a distinct group of individuals  
230 under “suppressive” antiretroviral treatment with good treatment adherence using 2 NRTIs  
231 and either efavirenz/nevirapine or PI-r as the first-line treatment. We also evaluated  
232 individuals who previously experienced antiretroviral virologic failure and had their HIV  
233 viremia subsequently suppressed with 2 NRTIs and a PI-r only or PI-r associated to

234 raltegravir. We also used as a “control group”, individuals experiencing virologic failure in  
235 which antiretroviral resistance had been detected. We attempted to avoid individuals not  
236 using or adhering to ART at the time of the study.

237 We were able to confirm the relationship between HIV-1 replication and the detection  
238 of episomal DNA, which was higher among individuals experiencing virologic failure  
239 compared to individuals with viral loads below detection, even with the smaller sample size  
240 of the virologic failure group.

241 We also detected a negative correlation between episomal DNA quantitation and the  
242 time of treatment with undetectable viral loads as well as a negative correlation between  
243 episomal DNA and CD8+ T-cell counts. It is conceivable that lower CD8 levels enable HIV-  
244 1 viral replication, as has been seen in animal models; the elimination of CD8+ T cells using  
245 monoclonal antibodies was associated with the return of detectable viremia in SIV-infected  
246 monkeys in spite of the use of suppressive ART (18). Likewise, we hypothesize that longer  
247 durations of effective antiretroviral treatment will progressively strengthen the immune  
248 system, by increasing the number of naïve CD4+ T cells and thus further decreasing residual  
249 HIV-1 replication. This speculation is further supported by the observation of a negative  
250 correlation between the levels of episomal DNA and CD4+ T-cell counts. However, we were  
251 not able to explain the negative correlation between episomal DNA levels and LPS levels.

252 Interestingly, the levels of total HIV DNA were found to be higher among individuals  
253 with evidence of residual HIV replication as inferred by the presence of episomal DNA. This  
254 association suggests that the pool of infected cells is being replenished or maintained in  
255 association with residual HIV replication.

256 We were not able to detect any differences between episomal or total DNA levels  
257 between first-line regimens and successful salvage therapy regimens, nor between NNRTI  
258 versus PI-r regimens or salvage therapy using two or three classes (NRTI + PI-r versus NRTI

259 + PI-r and raltegravir). However, the levels of antibodies were lower in first-line PI-r ART  
260 compared to the NNRTI group as the number of negative antibody results were higher among  
261 the initial PI-r treatment group. Furthermore, the levels of LPS were higher among the  
262 NNRTI first-line treatment group compared to the first-line PI-r or other salvage therapy  
263 groups that also have a PI-r in the treatment scheme. Notably, the proportion of patients  
264 taking tenofovir, abacavir or zidovudine was similar in the PI-r and NNRTI groups (Table  
265 S1). Although clinical trials have noted that NNRTI-based regimens are usually more durable  
266 and effective than PI-r-based regimens despite a basal viral load and higher CD4+ T-cell  
267 levels, these results are mainly due to better performance of intention to treat analyses, which  
268 are influenced by tolerance and adherence issues. Importantly, 14 individuals in the PI-r  
269 group were treated with boosted atazanavir, whereas 11 were treated with boosted lopinavir  
270 [Table S1]. However, this study analyzed patients on stable ART without adherence or  
271 tolerability issues. We can therefore hypothesize that the effective inhibition of two different  
272 steps of the HIV replicative cycle is more effective than inhibiting only one step.

273 We recognize that the retrospective cross-sectional nature of this study may preclude  
274 more definite conclusions. The evaluation of only one time point in this group prevents us  
275 from understanding the dynamics of these surrogate markers for HIV replication.  
276 Furthermore, other sensitive assays measuring residual HIV replication, such as cell-  
277 associated RNA or inflammatory markers, have not been evaluated here.

278 However, we were able to clearly demonstrate that episomal DNA was present in 26%  
279 to 38% of individuals with “successful” antiretroviral treatment, thus suggesting that residual  
280 HIV replication is occurring despite the scheme analyzed here. We were also able to  
281 demonstrate the association of PI-r schemes with lower antibody and LPS levels, which  
282 deserves further confirmation to better understand the related mechanisms involved that can  
283 explain these findings.

284

## 285 **Funding**

286 This work was supported by Fundo Nacional de Saude [TC252/2012], FAPESP,  
287 grants #04/15856-9, and by The Brazilian National Council of Technological and Scientific  
288 Development (CNPQ) for the fellowship of LG.

## 289 **Competing interests**

290 The authors have no competing interests to declare.

## 291 **Acknowledgements**

292 The authors are grateful to the study participants for their generous contribution to this  
293 research. We thank Rose Gabriel for helping with patient selection and recruitment.

## 294 **References**

- 295 1. Hunt PW, Martin JN, Sinclair E, Brecht B, Hagos E, Lampiris H, Deeks SG. 2003. T cell  
296 activation is associated with lower CD4+ T cell gains in human immunodeficiency virus-  
297 infected patients with sustained viral suppression during antiretroviral therapy. *J Infect*  
298 *Dis* 187:1534-43.
- 299 2. Maldarelli F, Palmer S, King MS, Wiegand A, Polis MA, Mican J, Kovacs JA, Davey RT,  
300 Rock-Kress D, Dewar R, Liu S, Metcalf JA, Rehm C, Brun SC, Hanna GJ, Kempf DJ, Coffin  
301 JM, Mellors JW. 2007. ART suppresses plasma HIV-1 RNA to a stable set point predicted  
302 by pretherapy viremia. *PLoS Pathog* 3:e46.
- 303 3. Palmer S, Maldarelli F, Wiegand A, Bernstein B, Hanna GJ, Brun SC, Kempf DJ, Mellors JW,  
304 Coffin JM, King MS. 2008. Low-level viremia persists for at least 7 years in patients on  
305 suppressive antiretroviral therapy. *Proc Natl Acad Sci U S A* 105:3879-84.
- 306 4. Reigadas S, Andreola ML, Wittkop L, Cosnefroy O, Anies G, Recordon-Pinson P, Thiebaut  
307 R, Masquelier B, Fleury H. 2010. Evolution of 2-long terminal repeat (2-LTR) episomal  
308 HIV-1 DNA in raltegravir-treated patients and in in vitro infected cells. *J Antimicrob*  
309 *Chemother* 65:434-7.
- 310 5. Komninakis SV, Santos DE, Santos C, Oliveros MP, Sanabani S, Diaz RS. 2012. HIV-1  
311 proviral DNA loads (as determined by quantitative PCR) in patients subjected to  
312 structured treatment interruption after antiretroviral therapy failure. *J Clin Microbiol*  
313 50:2132-3.
- 314 6. Cimerman S, Sucupira MC, Lewi DS, Diaz RS. 2007. Less sensitive HIV-1 enzyme  
315 immunoassay as an adjuvant method for monitoring patients receiving antiretroviral  
316 therapy. *AIDS Patient Care STDS* 21:100-5.
- 317 7. Jiang W, Lederman MM, Hunt P, Sieg SF, Haley K, Rodriguez B, Landay A, Martin J,  
318 Sinclair E, Asher AI, Deeks SG, Douek DC, Brenchley JM. 2009. Plasma levels of bacterial  
319 DNA correlate with immune activation and the magnitude of immune restoration in  
320 persons with antiretroviral-treated HIV infection. *J Infect Dis* 199:1177-85.

- 321 8. Buzon MJ, Massanella M, Llibre JM, Esteve A, Dahl V, Puertas MC, Gatell JM, Domingo P,  
322 Paredes R, Sharkey M, Palmer S, Stevenson M, Clotet B, Blanco J, Martinez-Picado J. HIV-  
323 1 replication and immune dynamics are affected by raltegravir intensification of HAART-  
324 suppressed subjects. *Nat Med* 16:460-5.
- 325 9. Sharkey ME, Teo I, Greenough T, Sharova N, Luzuriaga K, Sullivan JL, Bucy RP, Kostrikis  
326 LG, Haase A, Veryard C, Davaro RE, Cheeseman SH, Daly JS, Bova C, Ellison RT, 3rd, Mady  
327 B, Lai KK, Moyle G, Nelson M, Gazzard B, Shaunak S, Stevenson M. 2000. Persistence of  
328 episomal HIV-1 infection intermediates in patients on highly active anti-retroviral  
329 therapy. *Nat Med* 6:76-81.
- 330 10. Kumar AM, Borodowsky I, Fernandez B, Gonzalez L, Kumar M. 2007. Human  
331 immunodeficiency virus type 1 RNA Levels in different regions of human brain:  
332 quantification using real-time reverse transcriptase-polymerase chain reaction. *J*  
333 *Neurovirol* 13:210-24.
- 334 11. Fischer M, Wong JK, Russenberger D, Joos B, Opravil M, Hirschel B, Trkola A, Kuster H,  
335 Weber R, Gunthard HF, Swiss HIVCS. 2002. Residual cell-associated unspliced HIV-1  
336 RNA in peripheral blood of patients on potent antiretroviral therapy represents  
337 intracellular transcripts. *Antivir Ther* 7:91-103.
- 338 12. Anton PA, Mitsuyasu RT, Deeks SG, Scadden DT, Wagner B, Huang C, Macken C, Richman  
339 DD, Christopherson C, Borellini F, Lazar R, Hege KM. 2003. Multiple measures of HIV  
340 burden in blood and tissue are correlated with each other but not with clinical  
341 parameters in aviremic subjects. *AIDS* 17:53-63.
- 342 13. Hunt PW, Brenchley J, Sinclair E, McCune JM, Roland M, Page-Shafer K, Hsue P, Emu B,  
343 Krone M, Lampiris H, Douek D, Martin JN, Deeks SG. 2008. Relationship between T cell  
344 activation and CD4+ T cell count in HIV-seropositive individuals with undetectable  
345 plasma HIV RNA levels in the absence of therapy. *J Infect Dis* 197:126-33.
- 346 14. Siliciano JD, Kajdas J, Finzi D, Quinn TC, Chadwick K, Margolick JB, Kovacs C, Gange SJ,  
347 Siliciano RF. 2003. Long-term follow-up studies confirm the stability of the latent  
348 reservoir for HIV-1 in resting CD4+ T cells. *Nat Med* 9:727-8.
- 349 15. Sharkey ME, Stevenson M. 2001. Two long terminal repeat circles and persistent HIV-1  
350 replication. *Curr Opin Infect Dis* 14:5-11.
- 351 16. Jain V, Hartogensis W, Bacchetti P, Hunt PW, Hatano H, Sinclair E, Epling L, Lee TH,  
352 Busch MP, McCune JM, Pilcher CD, Hecht FM, Deeks SG. 2013. Antiretroviral therapy  
353 initiated within 6 months of HIV infection is associated with lower T-cell activation and  
354 smaller HIV reservoir size. *J Infect Dis* 208:1202-11.
- 355 17. Riddler SA, Haubrich R, DiRienzo AG, Peeples L, Powderly WG, Klingman KL, Garren KW,  
356 George T, Rooney JF, Brizz B, Lalloo UG, Murphy RL, Swindells S, Havlir D, Mellors JW,  
357 Team ACTGSA. 2008. Class-sparing regimens for initial treatment of HIV-1 infection. *N*  
358 *Engl J Med* 358:2095-106.
- 359 18. Cartwright EK, Spicer L, Smith SA, Lee D, Fast R, Paganini S, Lawson BO, Nega M, Easley  
360 K, Schmitz JE, Bosinger SE, Paiardini M, Chahroudi A, Vanderford TH, Estes JD, Lifson JD,  
361 Derdeyn CA, Silvestri G. 2016. CD8(+) Lymphocytes Are Required for Maintaining Viral  
362 Suppression in SIV-Infected Macaques Treated with Short-Term Antiretroviral Therapy.  
363 *Immunity* 45:656-68.

364

365 **Table 1: Demographic characteristics and mean T-cell counts between the different treatment groups.**

|                                       | N   | Gender |       | Age (years) |         |        | CD4+ T-cell count (cells/mm <sup>3</sup> ) |         |         |        | CD8+ T-cell count (cells/mm <sup>3</sup> ) |         |         |        |
|---------------------------------------|-----|--------|-------|-------------|---------|--------|--------------------------------------------|---------|---------|--------|--------------------------------------------|---------|---------|--------|
|                                       |     | Male   | Mean  | Maximum     | Minimum | Median | Mean                                       | Maximum | Minimum | Median | Mean                                       | Maximum | Minimum | Median |
| <b>1<sup>st</sup> Treatment NNRTI</b> | 26  | 21     | 47.17 | 63.40       | 32.20   | 50.55  | 791.3                                      | 1705.0  | 183.0   | 704.0  | 1033                                       | 1723    | 465     | 938    |
| <b>1<sup>st</sup> Treatment PI-r</b>  | 25  | 20     | 48.20 | 64.60       | 32.00   | 49.10  | 609.4                                      | 1062.0  | 330.0   | 549.0  | 990                                        | 2738    | 476     | 882    |
| <b>PI-r Salvage Therapy</b>           | 27  | 17     | 50.01 | 82.60       | 35.90   | 46.60  | 623.3                                      | 1592.0  | 67.0    | 560.0  | 924                                        | 1941    | 300     | 782    |
| <b>PI-r and RAL Salvage Therapy</b>   | 22  | 18     | 51.69 | 70.80       | 33.12   | 49.68  | 485.5                                      | 1308.0  | 34.0    | 420.0  | 996                                        | 1757    | 413     | 884    |
| <b>Virologic Failure</b>              | 16  | 9      | 40.35 | 67.00       | 19.60   | 38.65  | 185.3                                      | 566.0   | 1.0     | 126.0  | 828                                        | 2444    | 51      | 720    |
| <b>Total</b>                          | 116 | 85     | 47.97 | 82.60       | 19.60   | 48.33  | 571.4                                      | 1705.0  | 1.0     | 519.0  | 963                                        | 2738    | 51      | 873    |

366 NNRTI= non-nucleoside analog reverse-transcriptase inhibitor, PI-r = ritonavir boosted protease inhibitor, and RAL = Raltegravir.

367

368

369

370

371

372

373

374 **Table 2: Treatment response and characteristics between the distinct treatment groups.**

|                                       | Time (years) with undetectable viral load |         |         |        | Viral load (log <sub>10</sub> HIV copies/mL) |         |         |        | Number of treatment schemes |         |         |        | Number of drugs |         |         |        |
|---------------------------------------|-------------------------------------------|---------|---------|--------|----------------------------------------------|---------|---------|--------|-----------------------------|---------|---------|--------|-----------------|---------|---------|--------|
|                                       | Mean                                      | Maximum | Minimum | Median | Mean                                         | Maximum | Minimum | Median | Mean                        | Minimum | Maximum | Median | Mean            | Minimum | Maximum | Median |
| <b>1<sup>st</sup> Treatment NNRTI</b> | 6.43                                      | 14.60   | 2.30    | 5.60   | .                                            | .       | .       | .      | .                           | .       | .       | .      | .               | .       | .       | .      |
| <b>1<sup>st</sup> Treatment PI-r</b>  | 7.14                                      | 12.70   | 1.00    | 6.60   | .                                            | .       | .       | .      | .                           | .       | .       | .      | .               | .       | .       | .      |
| <b>PI-r Salvage Therapy</b>           | 6.81                                      | 13.60   | 1.00    | 7.60   | .                                            | .       | .       | .      | 6                           | 1       | 11      | 6      | 9               | 4       | 14      | 10     |
| <b>PI-r and RAL Salvage Therapy</b>   | 3.70                                      | 7.50    | 1.10    | 3.60   | .                                            | .       | .       | .      | 8                           | 1       | 13      | 7      | 12              | 5       | 19      | 13     |
| <b>Virologic Failure</b>              | .                                         | .       | .       | .      | 4.66                                         | 5.45    | 2.16    | 3.68   | 5                           | 2       | 14      | 4      | 9               | 6       | 15      | 7      |
| <b>Total</b>                          | 6.13                                      | 14.60   | 1.00    | 5.60   | 4.66                                         | 5.45    | 2.16    | 3.68   | .                           | .       | .       | .      | .               | .       | .       | .      |

375 NNRTI= non-nucleoside analog reverse-transcriptase inhibitor, PI-r = ritonavir boosted protease inhibitor, and RAL = Raltegravir

376

377



378 **Table 3: Prevalence of 2-LTR and HIV total DNA and EIA Optical density (ODn) and plasma LPS for the different treatment groups**

|                                       | 2-LTR (copies/10 <sup>6</sup> cells) |       |        | Total HIV DNA (copies/10 <sup>6</sup> cells) |        |        | ODn             |       |        | LPS     |       |        |
|---------------------------------------|--------------------------------------|-------|--------|----------------------------------------------|--------|--------|-----------------|-------|--------|---------|-------|--------|
|                                       | n positives (%)                      | Mean  | Median | n positives (%)                              | Mean   | Median | n positives (%) | Mean  | Median | Missing | Mean  | Median |
| <b>1<sup>st</sup> Treatment NNRTI</b> | 10 (38)                              | 12.99 | 0.00   | 25 (96)                                      | 145.65 | 101.15 | 17 (65)         | 1.505 | 1.201  | 20      | 0.462 | 0.448  |
| <b>1<sup>st</sup> Treatment PI-r</b>  | 7 (28)                               | 2.86  | 0.00   | 24 (96)                                      | 139.87 | 81.14  | 7 (28)          | 0.914 | 0.653  | 17      | 0.227 | 0.206  |
| <b>PI-r Salvage Therapy</b>           | 7 (26)                               | 3.14  | 0.00   | 25 (93)                                      | 115.42 | 84.32  | 15 (56)         | 1.194 | 1.252  | 14      | 0.143 | 0.140  |
| <b>PI-r and RAL Salvage Therapy</b>   | 6 (27)                               | 1.46  | 0.00   | 21 (95)                                      | 168.65 | 123.23 | 11 (50)         | 1.086 | 0.782  | 6       | 0.234 | 0.162  |
| <b>Virologic Failure</b>              | 9 (56)                               | 5.35  | 2.54   | 16 (100)                                     | 301.30 | 196.62 | 11 (69)         | 1.470 | 1.412  | 3       | 0.299 | 0.226  |
| <b>Total</b>                          | 39 (34)                              | 5.27  | 0      | 111 (96)                                     | 164.37 | 101.78 | 61 (53)         | 1.221 | 0.887  |         |       |        |

379 NNRTI= non-nucleoside analog reverse-transcriptase inhibitor, PI-r = ritonavir boosted protease inhibitor, and RAL = Raltegravir

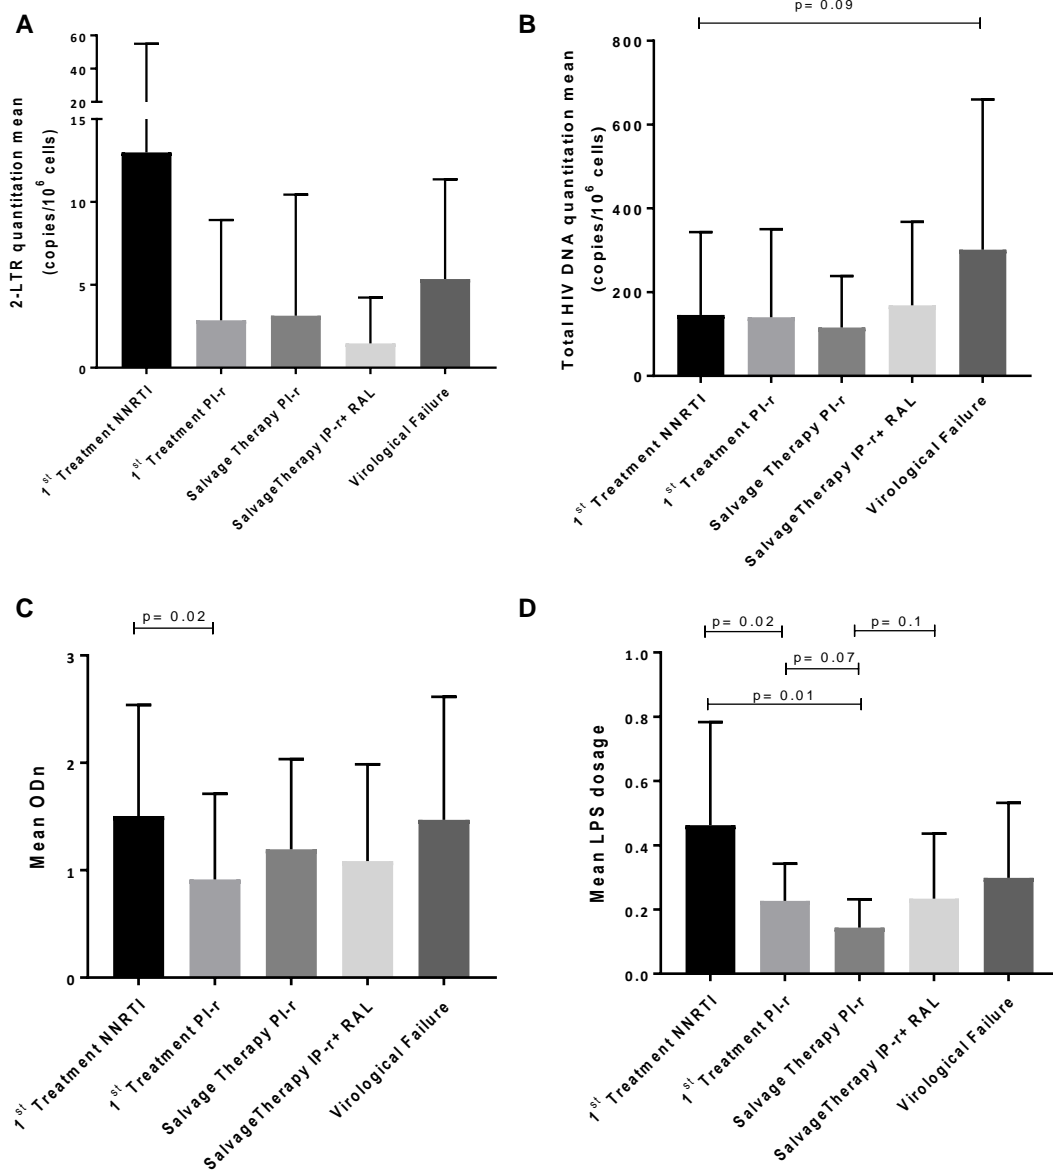

380

381 **Figure 1:** Mean levels of 2-LTR HIV DNA (Panel A), total HIV DNA (Panel B), EIA optical  
 382 density (ODn; Panel C) and LPS levels (panel D) among the different treatment groups. Bars  
 383 show standard deviation. P values lower than 0.1 are indicated.

384

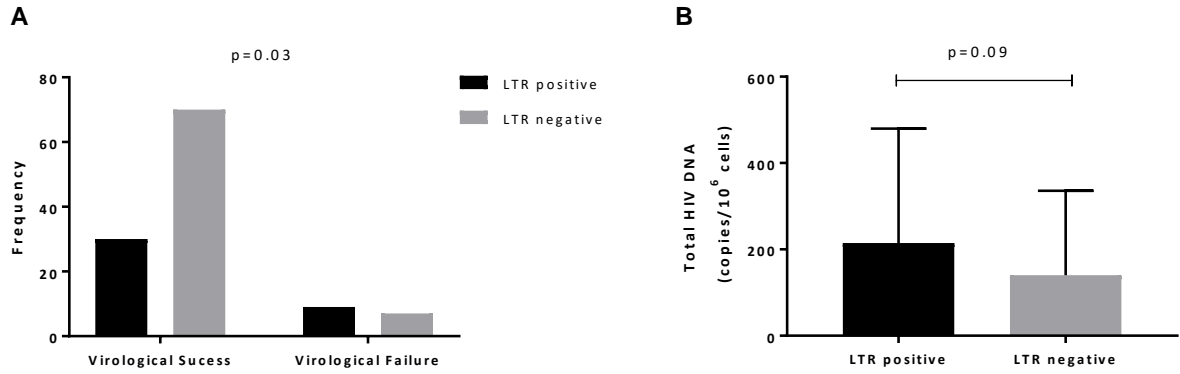

385  
386

387 **Figure 2:** (A) Frequency of 2-LTR positive samples among patients with virologic success and  
388 virologic failure. (B) Mean levels of total HIV DNA in 2-LTR positive and negative samples. Bars  
389 show standard deviation.

390

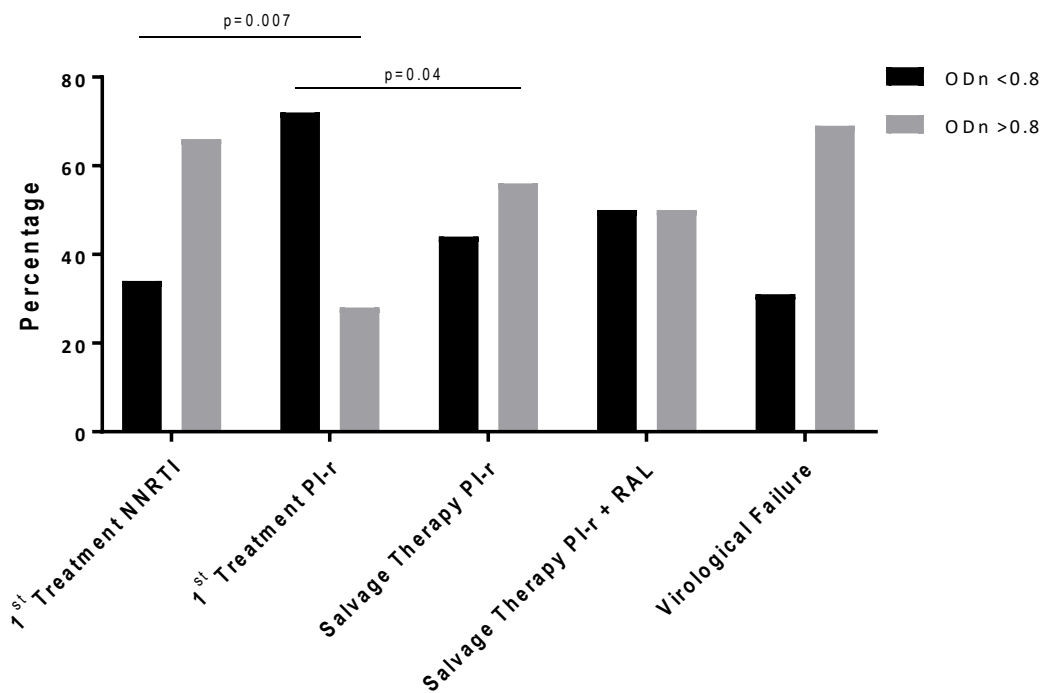

391  
392

393 **Figure 3:** Frequency of samples in which the less sensitive anti-HIV EIA optical density (ODn)  
was higher or lower than 0.8, indicating a positive and negative result, respectively
